# Supplementary material
Source: Atypon-hosted journal article supplement (https://static.yanyin.tech/literature/current_protocol/10.1002/cpz1.114/attachments/downloadSupplement)
Supplement: downloadSupplement [file downloadSupplement]

## Sheet: Suppl. Data S1-fragment mass
Supplemental Data S1: List of fragment mass, atom type and number of atoms in Alanine, Serine and Glucose for corrector software.
			Fragment mass			Atom type and number of atoms
Type	Name	Identifier in corconfig file	Lowest fragment mass	Highest fragment mass	Sum of all atoms in the fragment and labelling positions	C	H	O	N	S	Si	P
Amino acid	Alanine	M000026_A110001-101_METB_1090.7_Alanine_(2TMS)_MP	116	118	22	5	13	0	1	0	1	2
Amino acid	Serine	M000015_A138001-101_METB_1353.33_Amino_acid_Serine_(3TMS)_MP	204	206	36	8	22	1	1	0	2	2
Sugar	Glucose	M000040_A189002-101_METB_1881.63_Sugar_(Hexose,_Aldose)_Glucose_(5TMS)_(1MEOX)_MP	160	162	26	6	14	2	1	0	1	2

## Sheet: Suppl. Data S2-input
Supplemental Data S2: Example of input.txt file to determine 13C enrichment of alanine and serine in soluble and protein fractions, and glucose in cell wall material. This dataset was used in Ishihara et al. (2017)
Highlighted in grey are additional information for the reader. They are not included in the input.txt file
	Analyte_ID	Tag_mass	Ang0_ZT0	Bsch2_ZT0	Bu2_ZT0	Col0_ZT0	Cvi_ZT0	Da0_ZT0	Ei2_ZT0	Kl0_ZT0	Lip0_ZT0	Mh1_ZT0	Old1_ZT0	Peter_ZT0	RRS7_ZT0	Ang0_ZT24	Bsch2_ZT24	Bu2_ZT24	Col0_ZT24	Cvi_ZT24	Da0_ZT24	Ei2_ZT24	Kl0_ZT24	Lip0_ZT24	Mh1_ZT24	Old1_ZT24	Peter_ZT24	RRS7_ZT24	Ang0_ZT120	Bsch2_ZT120	Bu2_ZT120	Col0_ZT120	Cvi_ZT120	Da0_ZT120	Ei2_ZT120	Kl0_ZT120	Lip0_ZT120	Mh1_ZT120	Old1_ZT120	Peter_ZT120	RRS7_ZT120
soluble fraction	M000026_A110001-101_METB_1090.7_Alanine_(2TMS)_MP	116	3.24353e+06	2.43399e+06	1.70394e+06	2.87474e+06	3.49527e+06	2.87034e+06	2.99543e+06	2.67062e+06	3.44385e+06	3.25565e+06	2.38134e+06	3.75853e+06	4.1339e+06	582138	400289	592754	357961	794297	361721	646043	242809	707213	457802	422654	259259	632764	5.03185e+06	3.47506e+06	2.89947e+06	2.55254e+06	4.53254e+06	2.93679e+06	3.24151e+06	3.0167e+06	5.22094e+06	3.18606e+06	2.97018e+06	4.19308e+06	4.2064e+06
soluble fraction	M000026_A110001-101_METB_1090.7_Alanine_(2TMS)_MP	117	432604	326215	226806	378959	469614	375761	395395	354897	452326	423540	316023	499648	542992	493366	515985	605972	373316	526615	408381	579260	397699	581157	538281	489840	365524	712140	685519	472204	397150	344033	611496	398896	428221	413172	702722	426806	400024	566555	567046
soluble fraction	M000026_A110001-101_METB_1090.7_Alanine_(2TMS)_MP	118	141464	105521	72586.4	126373	163946	126954	134904	115080	151282	144469	104948	166837	180607	1.36504e+06	1.59232e+06	1.79006e+06	957437	1.24812e+06	1.21744e+06	1.6456e+06	1.24447e+06	1.57e+06	1.5519e+06	1.38384e+06	1.09718e+06	2.16509e+06	250640	163403	139041	120414	214342	137955	152972	148709	257358	149743	138508	199655	204428
soluble fraction	M000015_A138001-101_METB_1353.33_Amino_acid_Serine_(3TMS)_MP	204	369582	228596	216259	325670	385457	283811	359920	271186	367522	304800	187956	442292	446504	73917.4	54553.7	86764.6	38528.7	107451	68271.2	70203.2	44331	88819	52517.5	44179.6	31155.3	81756.6	885052	428932	429732	281188	627413	358519	453958	384170	780056	346532	427947	477201	558472
soluble fraction	M000015_A138001-101_METB_1353.33_Amino_acid_Serine_(3TMS)_MP	205	75463.5	46687.8	44247.7	66365.1	79678.7	58044.5	74424.9	55638.2	74846.3	62766.2	38162.4	90776.8	92395.2	84405.8	86615.2	106181	47604.3	102850	62709	98417.9	55511.3	109275	71989.9	60651.8	47048.7	120921	194653	93656.5	94274.7	60950.8	136888	77987.1	99369.8	84064.2	170445	76194.9	91321.8	103026	121584
soluble fraction	M000015_A138001-101_METB_1353.33_Amino_acid_Serine_(3TMS)_MP	206	32271.6	19638.6	18563	28393.4	35465.3	24992.9	32927.4	23584.1	32056.5	27072.4	16115.5	39356.8	39844.2	161674	173591	200572	85976.1	162196	118157	183635	112774	207766	137158	122907	103068	256618	88639.9	41307.1	41567.7	26592.9	61448.9	34334.7	43952.3	37535.9	76939	33409.1	40158.6	45500.1	54353.7
protein fraction	M000026_A110001-101_METB_1090.7_Alanine_(2TMS)_MP	116	832791	132121	877170	699105	419472	650505	776386	414061	438175	735713	474615	445364	398038	510242	556587	567067	314020	390038	588416	351046	462639	584150	531312	322107	509782	329721	296144	385667	714538	636470	586084	748667	144873	665369	381562	517645	447171	136634	569909
protein fraction	M000026_A110001-101_METB_1090.7_Alanine_(2TMS)_MP	117	22724.9	1310.39	25415.8	18535.4	0	17505.1	21449.3	0	0	20103.3	0	0	0	58647.6	60190.6	65445.8	22208.5	39189.3	64505.2	19526.8	55637.5	63607.2	55637.7	20005.2	57772.4	20268	14702.2	20660.1	62317	59443.7	50969.8	64607.5	10691.8	65252.8	18730	45478.4	38837.8	8902.49	38920.9
protein fraction	M000026_A110001-101_METB_1090.7_Alanine_(2TMS)_MP	118	5740.08	0	6006.41	4575.96	0	4368.7	5316.51	0	0	4932.92	0	0	0	152185	150088	158698	60491.5	106706	171663	63237.1	139580	169804	149021	64366.3	146742	65150.4	10129.2	14109.5	37679.3	36645.6	34272.9	42476.5	6920.21	41760	12830.7	30190	26652.5	5695.3	25990.3
protein fraction	M000015_A138001-101_METB_1353.33_Amino_acid_Serine_(3TMS)_MP	204	246929	30315.4	254612	215926	171614	213548	218077	199891	173652	233599	191420	206001	147739	169809	163566	166819	133905	120281	171840	145295	147120	174446	156504	158792	164360	146815	124508	149548	215752	187382	173135	217125	42202.7	211378	154718	176092	145000	59846.3	150650
protein fraction	M000015_A138001-101_METB_1353.33_Amino_acid_Serine_(3TMS)_MP	205	3735.45	46.8563	3939.12	2725.22	405.641	3472.5	3593.76	161.736	538.731	3482.13	292.481	0	642.955	21201.3	17948.8	19900.3	13863.9	13045	19151.6	11793.8	18241.7	19020.4	17376.3	14444.1	18695.1	13037.2	8064.43	9717.34	16720.8	14979.4	13589	16652.4	2855.56	17623.9	9636.25	13964.6	11411.8	4025.36	10908.8
protein fraction	M000015_A138001-101_METB_1353.33_Amino_acid_Serine_(3TMS)_MP	206	792.346	0	868.074	670.631	0	772.267	1102.15	0	0	750.741	0	0	0	46491.1	38586.9	39892.7	29730	29634.9	43587.5	29442.7	38415.4	43366	38545.8	36505.6	41367.4	32704.5	4938.21	6175.13	9125.59	8246.7	8204.52	9911.44	1718.17	10214.1	6347.82	8542.07	6759.94	2364.03	6688.33
cell wall	M000040_A189002-101_METB_1881.63_Sugar_(Hexose,_Aldose)_Glucose_(5TMS)_(1MEOX)_MP	160	249410	240058	135517	211542	265705	265902	246523	275316	223093	141603	253281	274196	233859	254939	260401	277683	215747	290683	273863	246841	271653	278079	218865	271361	277268	274661	214515	248294	222391	250793	167216	228127	230653	197762	204266	199433	200926	155892	204172
cell wall	M000040_A189002-101_METB_1881.63_Sugar_(Hexose,_Aldose)_Glucose_(5TMS)_(1MEOX)_MP	161	43109	41291	23506	36487	45997	45937	42684	47444	38501	24488	43816	47345	40522	59169	57532	61408	65941	66624	61536	55784	61509	64306	49382	62008	64217	64355	67763	75887	67531	57325	51143	73246	70702	63658	66366	63713	65244	49278	66378
cell wall	M000040_A189002-101_METB_1881.63_Sugar_(Hexose,_Aldose)_Glucose_(5TMS)_(1MEOX)_MP	162	12550	11912	6547	10576	13379	13278	12416	13676	11148	6741	12644	13658	11743	35862	32180	34903	55211	40736	35587	32590	36359	39320	28421	36832	39293	40216	59480	64922	57024	33706	43154	65059	60791	56354	59373	55977	58137	42729	60847

## Sheet: Suppl. Data S3 - Enrichmemt
Supplemental Data S3: 13C enrichment (%) data obtained from Supplemental Data S2 and calculation of KS and KD, and RGRSTR.
Free amino acids were only measured at EN (ZT24), and their 13C enrichments decreased slightly between ED and EN (Ishihara et al., 2015). 13C enrichment value at time 24 hour were adjusted by taking into account the decay during the night based on the changes reported previously in Col-0 (Ishihara et al., 2015)
Units for KS(pulse), KS (chase), KD(pulse) and KD(chase) are fractions of total protein synthesized or degraded per day (mg protein mg -1 protein day-1)
RGRSTR(Pulse) = mean 13C enrichment in glucose from cell wall material at ZT0 substracted from mean 13C enrichment in glucose at ZT24 (unit = % glucose in total glucose in cell wall day-1). No correction of incomplete enrichment of the precursor is applied because it is known that enrichment in immediate precursors is approaching 100%.
RGRSTR(Chase) = dilution of 13C enrichment in glucose from cell wall material during a 4-day-long chase period (unit = % glucose in total glucose in cell wall day-1).
									Average									RGRSTR(pulse)	KS(pulse)	KS(pulse)	KD(pulse)	KD(pulse)
Genotype	Experiment	Time (h)	Prot_Alanine	Prot_Serine	Free_Alanine	Free_Serine	Glucose		Genotype	Time (h)	Prot_Alanine	Prot_Serine	Free_Alanine	Free_Serine	Glucose			Glucose	Alanine	Serine	Alanine	Serine
Ang0	Exp1	0	0.00826993	0.0113738	0.0126226	0.00757319	0.0361326		Ang0	0	0.013619	0.00927009	0.00946274	0.00477093	0.032054		Ang0	0.231585	0.276582	0.268768	0.0449975	0.037183
Bsch2	Exp1	0	0.00999288	0.0123577	0.0129015	0.0063688	0.0422426		Bsch2	0	0.0101036	0.00676096	0.00778438	0.00379198	0.0339711		Bsch2	0.244996	0.234707	0.226808	-0.0102885	-0.018188
Bu2	Exp1	0	0	0.00932006	0.0119326	0.00663631	0.0342783		Bu2	0	0.0128659	0.00939108	0.0074092	0.00393659	0.0291444		Bu2	0.230231	0.255291	0.241533	0.0250601	0.0113025
Col0	Exp1	0	0.0105399	0.0131406	0.0114464	0.00782283	0.036292		Col0	0	0.00807057	0.0100003	0.00927351	0.00358865	0.0375532		Col0	0.216664	0.247805	0.254114	0.0311409	0.0374493
Cvi	Exp1	0	0	0	0.0164173	0.0119234	0.0344001		Cvi	0	0.0111692	0.00179951	0.00893233	0.00648052	0.0322713		Cvi	0.213795	0.266252	0.265876	0.0524562	0.0520806
Da0	Exp1	0	0.0106803	0.0133016	0.0134851	0.00874196	0.0318258		Da0	0	0.0170476	0.0114756	0.00730201	0.00326907	0.0330251		Da0	0.229126	0.249958	0.254062	0.0208328	0.0249369
Ei2	Exp1	0	0.00542407	0.0107872	0.0143722	0.0118151	0.0373408		Ei2	0	0.0128379	0.00934562	0.00997002	0.00690792	0.0318059		Ei2	0.224386	0.209593	0.225443	-0.0147932	0.00105677
Kl0	Exp1	0	0.0115565	0.013752	0.011982	0.0073506	0.0410403		Kl0	0	0.00891727	0.00761114	0.00803045	0.00379042	0.0336909		Kl0	0.221302	0.252201	0.246996	0.0308991	0.0256944
Lip0	Exp1	0	0	0	0.0133684	0.00728131	0.0357553		Lip0	0	0	0.00285846	0.00847472	0.00455738	0.0335901		Lip0	0.224894	0.279175	0.261489	0.0542816	0.0365949
Mh1	Exp1	0	0.010528	0.0131249	0.0136073	0.00908047	0.0341449		Mh1	0	0.0145802	0.00989838	0.00909672	0.00376534	0.0304902		Mh1	0.23475	0.250684	0.243018	0.0159339	0.00826811
Old1	Exp1	0	0.0118826	0.0137466	0.0128693	0.0078466	0.0358146		Old1	0	0.0095822	0.00615598	0.00946506	0.00496619	0.0338585		Old1	0.253061	0.231965	0.24228	-0.0210965	-0.0107812
Peter	Exp1	0	0.00846654	0.0108721	0.0139201	0.00837829	0.0435531		Peter	0	0.00678778	0.00548428	0.00917613	0.00479487	0.0361334		Peter	0.217029	0.253943	0.253156	0.0369139	0.0361264
RRS7	Exp1	0	0.010503	0.0129153	0.0132424	0.00912299	0.0362186		RRS7	0	0.00853087	0.00753976	0.00811533	0.00535625	0.031319		RRS7	0.242597	0.232914	0.239389	-0.00968256	-0.00320743
Ang0	Exp2	0	0.0127295	0.00585786	0.0103489	0.0038311	0.0384871		Ang0	24	0.237449	0.231697	0.809272	0.827578	0.263639
Bsch2	Exp2	0	0.0154076	0.00715355	0.00669642	0.00190875	0.0369241		Bsch2	24	0.218778	0.205488	0.889083	0.876194	0.278967			RGRSTR(chase)	KS(chase)	KS(chase)	KD(chase)	KD(chase)
Bu2	Exp2	0	0.0180008	0.00791477	0.00608615	0.00236204	0.0311489		Bu2	24	0.223082	0.21057	0.823437	0.832925	0.259375			Glucose	Alanine	Serine	Alanine	Serine
Col0	Exp2	0	0.0136718	0.00758961	0.00870199	0	0.046473		Col0	24	0.210373	0.214677	0.816378	0.805453	0.254218		Ang0	0.198804	0.26803	0.262331	0.0692258	0.0635263
Cvi	Exp2	0	0.0143392	0.00421948	0.00662683	0.00365944	0.0370423		Cvi	24	0.219929	0.212419	0.784071	0.792171	0.246067		Bsch2	0.219711	0.266931	0.26735	0.0472193	0.0476381
Da0	Exp2	0	0.0209477	0.00960728	0.0054351	0	0.0450061		Da0	24	0.237543	0.224537	0.88213	0.838618	0.262151		Bu2	0.216598	0.24172	0.252413	0.0251212	0.0358149
Ei2	Exp2	0	0.0131167	0.00423625	0.00834978	0.0034854	0.0361823		Ei2	24	0.193283	0.206986	0.860935	0.876676	0.256192		Col0	0.206496	0.225615	0.25244	0.0191191	0.0459439
Kl0	Exp2	0	0.0151953	0.0086772	0.00616452	0	0.0378034		Kl0	24	0.231587	0.219598	0.882906	0.858261	0.254993		Cvi	0.191648	0.235096	0.251988	0.0434477	0.0603396
Lip0	Exp2	0	0	0.00702899	0.00802926	0.00328074	0.0442104		Lip0	24	0.234342	0.225394	0.839407	0.851032	0.258484		Da0	0.205971	0.25466	0.267481	0.0486885	0.0615098
Mh1	Exp2	0	0.0135155	0.00609303	0.00942114	0	0.0354541		Mh1	24	0.234207	0.219176	0.87611	0.861161	0.26524		Ei2	0.204	0.218826	0.254671	0.0148266	0.0506712
Old1	Exp2	0	0.016864	0.00395854	0.00584047	0	0.0438764		Old1	24	0.21223	0.216322	0.873616	0.867453	0.28692		Kl0	0.21513	0.239651	0.253447	0.024521	0.0383178
Peter	Exp2	0	0.0118968	0.00558075	0.00747766	0.00236785	0.0387057		Peter	24	0.238156	0.22546	0.911104	0.868936	0.253163		Lip0	0.207335	0.317683	0.281213	0.110347	0.0738775
RRS7	Exp2	0	0.0150896	0.00753741	0.00689869	0.00283828	0.0359485		RRS7	24	0.211873	0.218347	0.873036	0.880604	0.273916		Mh1	0.216316	0.238851	0.242157	0.0225342	0.0258406
Ang0	Exp3	0	0.0198577	0.0105786	0.00541672	0.0029085	0.0215423		Ang0	120	0.0812747	0.0811343	0.0179543	0.0241667	0.108634		Old1	0.232581	0.218318	0.24566	-0.0142623	0.0130798
Bsch2	Exp3	0	0.00491036	0.000771621	0.00375521	0.00309839	0.0227465		Bsch2	120	0.0752137	0.0705267	0.0150182	0.0185252	0.103413		Peter	0.197416	0.256179	0.26076	0.0587624	0.063344
Bu2	Exp3	0	0.020597	0.0109384	0.00420885	0.00281142	0.022006		Bu2	120	0.084831	0.0767203	0.0155782	0.0180816	0.0976937		RRS7	0.212436	0.230613	0.245135	0.0181772	0.0326993
Col0	Exp3	0	0	0.00927058	0.00767213	0.00294311	0.0298947		Col0	120	0.0853213	0.0782083	0.0151207	0.0179129	0.100787
Cvi	Exp3	0	0.0191683	0.00117905	0.00375286	0.00385871	0.0253715		Cvi	120	0.0858777	0.0775257	0.0185167	0.0238759	0.105064
Da0	Exp3	0	0.0195147	0.0115179	0.00298582	0.00106526	0.0222433		Da0	120	0.0857737	0.077024	0.0177493	0.0215879	0.104207
Ei2	Exp3	0	0.0199728	0.0130134	0.00718809	0.00542325	0.0218945		Ei2	120	0.080548	0.0747363	0.0147654	0.0194708	0.102853
Kl0	Exp3	0	0	0.000404234	0.00594482	0.00402066	0.0222291		Kl0	120	0.088797	0.0796793	0.0165306	0.0206878	0.0967652
Lip0	Exp3	0	0	0.00154638	0.00402651	0.0031101	0.0208045		Lip0	120	0.0657625	0.0731855	0.0171266	0.0220934	0.102045
Mh1	Exp3	0	0.0196971	0.0104772	0.00426173	0.00221556	0.0218717		Mh1	120	0.0900893	0.0832	0.0159912	0.0193711	0.100047
Old1	Exp3	0	0	0.000762811	0.00968542	0.00705196	0.0218845		Old1	120	0.0886237	0.080974	0.0171869	0.0158298	0.0995157
Peter	Exp3	0	0	0	0.00613062	0.00363846	0.0261414		Peter	120	0.085474	0.079448	0.0172375	0.0194148	0.105041
RRS7	Exp3	0	0	0.00216656	0.00420489	0.00410747	0.0217898		RRS7	120	0.0842287	0.0819037	0.0151341	0.0187716	0.10538
Ang0	Exp1	24	0.223179	0.228872	0.791977	0.807106	0.292084
Bsch2	Exp1	24	0.204985	0.196894	0.887103	0.88042	0.285337
Bu2	Exp1	24	0.214593	0.206289	0.840789	0.817584	0.25484
Col0	Exp1	24	0.220407	0.219026	0.811339	0.80553	0.247784
Cvi	Exp1	24	0.201851	0.206369	0.699241	0.712039	0.281779
Da0	Exp1	24	0.230089	0.224485	0.859022	0.753791	0.247794
Ei2	Exp1	24	0.218289	0.219606	0.808343	0.839816	0.277965
Kl0	Exp1	24	0.218198	0.217215	0.921676	0.840023	0.246905
Lip0	Exp1	24	0.219619	0.226433	0.779176	0.819937	0.298994
Mh1	Exp1	24	0.23195	0.21927	0.858204	0.841549	0.300735
Old1	Exp1	24	0.223079	0.218719	0.851633	0.857028	0.310041
Peter	Exp1	24	0.23238	0.225202	0.894022	0.893549	0.29097
RRS7	Exp1	24	0.232928	0.23889	0.864431	0.883752	0.312183
Ang0	Exp2	24	NA	0.225833	0.828183	0.830569	0.235194
Bsch2	Exp2	24	0.216388	0.203484	0.925437	0.903691	0.297976
Bu2	Exp2	24	0.212719	0.205475	0.867169	0.866323	0.297164
Col0	Exp2	24	0.230244	0.218457	0.801056	0.793719	0.286454
Cvi	Exp2	24	0.222272	0.209009	0.829471	0.82669	0.219246
Da0	Exp2	24	0.235246	0.222494	0.931883	0.925671	0.300738
Ei2	Exp2	24	NA	0.211894	0.875287	0.89346	0.294118
Kl0	Exp2	24	0.222102	0.208304	0.905847	0.894437	0.299642
Lip0	Exp2	24	0.23681	0.226483	0.860976	0.861401	0.245216
Mh1	Exp2	24	0.230389	0.215903	0.868589	0.872302	0.232154
Old1	Exp2	24	0.230653	0.221765	0.88015	0.896551	0.310562
Peter	Exp2	24	0.236213	0.225199	0.948097	0.881601	0.239054
RRS7	Exp2	24	0.221345	0.212454	0.912837	0.909024	0.290779
Ang0	Exp3	24	0.25172	0.240385	0.807656	0.84506	NA
Bsch2	Exp3	24	0.23496	0.216087	0.854709	0.84447	0.253587
Bu2	Exp3	24	0.241934	0.219947	0.762352	0.814868	0.226122
Col0	Exp3	24	0.180469	0.206548	0.836739	0.817111	0.228415
Cvi	Exp3	24	0.235665	0.221878	0.823502	0.837783	0.237175
Da0	Exp3	24	0.247295	0.226632	0.855484	0.836392	0.23792
Ei2	Exp3	24	0.168278	0.189457	0.899175	0.896751	0.196492
Kl0	Exp3	24	0.254461	0.233276	0.821196	0.840323	0.218431
Lip0	Exp3	24	0.246596	0.223265	0.87807	0.87176	0.231241
Mh1	Exp3	24	0.240281	0.222355	0.901537	0.869634	0.262831
Old1	Exp3	24	0.182959	0.208483	0.889066	0.848779	0.240156
Peter	Exp3	24	0.245876	0.22598	0.891191	0.831657	0.229464
RRS7	Exp3	24	0.181347	0.203697	0.84184	0.849037	0.218785
Ang0	Exp1	120	0.090521	0.091441	0.0258103	0.0303278	0.123148
Bsch2	Exp1	120	0.082887	0.069683	0.0207005	0.0246528	0.105076
Bu2	Exp1	120	0.073909	0.076741	0.0217841	0.0258909	0.0987587
Col0	Exp1	120	0.075614	0.081774	0.0207452	0.0248382	0.109369
Cvi	Exp1	120	0.079901	0.081275	0.0220494	0.026493	0.116051
Da0	Exp1	120	0.083356	0.081071	0.0202811	0.0249491	0.114857
Ei2	Exp1	120	0.083275	0.08381	0.0211868	0.0266313	0.109682
Kl0	Exp1	120	0.078774	0.080573	0.0236739	0.027064	0.103543
Lip0	Exp1	120	0.077798	0.080959	0.0249214	0.0279029	0.11003
Mh1	Exp1	120	0.08969	0.086628	0.0210376	0.0260384	0.100904
Old1	Exp1	120	0.089882	0.089687	0.0201858	0.0214497	0.105411
Peter	Exp1	120	0.095269	0.092869	0.0222924	0.0241093	0.111954
RRS7	Exp1	120	0.091324	0.091903	0.0238452	0.0267464	0.116033
Ang0	Exp2	120	0.098843	0.086728	0.0193588	0.0268409	0.112693
Bsch2	Exp2	120	0.084625	0.075203	0.0128713	0.00933084	0.109487
Bu2	Exp2	120	0.096072	0.081044	0.0150532	0.0134157	0.105949
Col0	Exp2	120	0.089753	0.078132	0.0137046	0.0108253	0.104748
Cvi	Exp2	120	0.088717	0.074356	0.0159375	0.0107198	0.105963
Da0	Exp2	120	0.086579	0.075161	0.0125982	0.0126496	0.105967
Ei2	Exp2	120	0.082878	0.073144	0.0118175	0.0127396	0.106065
Kl0	Exp2	120	0.091309	0.07893	0.0135631	0.0125355	0.106921
Lip0	Exp2	120	NA	NA	0.014976	0.0186056	0.105396
Mh1	Exp2	120	0.091368	0.084803	0.0157038	0.0139406	0.102035
Old1	Exp2	120	0.086122	0.076838	0.0122602	0.00350118	0.109048
Peter	Exp2	120	0.09406	0.079397	0.0129644	0.011306	0.112161
RRS7	Exp2	120	0.089766	0.081636	0.0129413	0.0138758	0.104441
Ang0	Exp3	120	0.05446	0.065234	0.0086939	0.0153315	0.0900596
Bsch2	Exp3	120	0.058129	0.066694	0.0114828	0.0215921	0.0956746
Bu2	Exp3	120	0.084512	0.072376	0.00989747	0.0149382	0.0883734
Col0	Exp3	120	0.090597	0.074719	0.0109124	0.0180752	0.0882429
Cvi	Exp3	120	0.089015	0.076946	0.0175632	0.034415	0.0931788
Da0	Exp3	120	0.087386	0.07484	0.0203687	0.027165	0.0917966
Ei2	Exp3	120	0.075491	0.067255	0.011292	0.0190415	0.0928128
Kl0	Exp3	120	0.096308	0.079535	0.0123548	0.022464	0.0798317
Lip0	Exp3	120	0.053727	0.065412	0.0114824	0.0197717	0.0907086
Mh1	Exp3	120	0.08921	0.078169	0.011232	0.0181343	0.0972007
Old1	Exp3	120	0.089867	0.076397	0.0191149	0.0225386	0.084088
Peter	Exp3	120	0.067093	0.066078	0.0164557	0.0228291	0.0910094
RRS7	Exp3	120	0.071596	0.072172	0.00861562	0.0156925	0.0956673

## Sheet: Suppl. Data S4 - Ks(pulse)
Supplemental Data S4: KS(pulse) and propagated error obtained with R script.
Genotype	KS(pulse)_Alanine	SE (KS(pulse)_Alanine)	KS(pulse)_Serine	SE (KS(pulse)_Serine)
Ang0	0.276582	0.0154118	0.268768	0.00677514
Bsch2	0.234707	0.0117162	0.226808	0.00870619
Bu2	0.255291	0.0169873	0.241533	0.00750757
Col0	0.247805	0.0195849	0.254114	0.00584878
Cvi	0.266252	0.0204672	0.265876	0.0148686
Da0	0.249958	0.00981915	0.254062	0.0151564
Ei2	0.209593	0.0251001	0.225443	0.0117449
Kl0	0.252201	0.0166053	0.246996	0.0109597
Lip0	0.279175	0.0138293	0.261489	0.00561331
Mh1	0.250684	0.005979	0.243018	0.00424917
Old1	0.231965	0.01813	0.24228	0.00765992
Peter	0.253943	0.00781727	0.253156	0.00660581
RRS7	0.232914	0.0194346	0.239389	0.013381

## Sheet: Suppl. Data S5 - RGRSTR(pulse)
Supplemental Data S5: RGRSTR(pulse) and propagated error obtained with R script.
Genotype	RGRSTR(pulse)	SE (RGRSTR(pulse))
Ang0	0.231585	0.0238222
Bsch2	0.244996	0.0144291
Bu2	0.230231	0.020959
Col0	0.216664	0.0177302
Cvi	0.213795	0.0189239
Da0	0.229126	0.020589
Ei2	0.224386	0.0306174
Kl0	0.221302	0.0244882
Lip0	0.224894	0.0217571
Mh1	0.23475	0.0203005
Old1	0.253061	0.0242486
Peter	0.217029	0.0197972
RRS7	0.242597	0.0286484

## Sheet: Suppl. Data S6 - KD(pulse)
Supplemental Data S6: KD(pulse) and propagated error obtained with R script.
Genotype	KD(pulse)_Alanine	SE (KD(pulse)_Alanine)	KD(pulse)_Serine	SE (KD(pulse)_Serine)
Ang0	0.0585447	0.0278833	0.0515156	0.0245717
Bsch2	0.00287226	0.017895	-0.0121841	0.0161654
Bu2	0.0391329	0.0245528	0.0240255	0.0223906
Col0	0.0427625	0.0258969	0.0480697	0.0185401
Cvi	0.0652599	0.0249166	0.0557301	0.0222483
Da0	0.0469675	0.0232032	0.0318504	0.0222879
Ei2	-0.0019154	0.0388249	0.0138559	0.0326504
Kl0	0.0447118	0.0283598	0.0309409	0.0264083
Lip0	0.0523617	0.024335	0.0417751	0.0224582
Mh1	0.0348761	0.0207616	0.0175724	0.0205512
Old1	-0.00926803	0.0297273	-0.00456747	0.0248256
Peter	0.0505562	0.0206918	0.0362913	0.0201553
RRS7	-0.000958429	0.0339464	0.00642469	0.0313243

## Sheet: Suppl. Data S7 - KS(chase)
Supplemental Data S7: KS(chase) and propagated error obtained with R script.
Genotype	KS(chase)_Alanine	SE (KS(chase)_Alanine)	KS(chase)_Serine	SE (KS(chase)_Serine)
Ang0	0.26803	0.0436567	0.262331	0.0253089
Bsch2	0.266931	0.0301432	0.26735	0.0111792
Bu2	0.24172	0.0216259	0.252413	0.00987652
Col0	0.225615	0.0230191	0.25244	0.0080522
Cvi	0.235096	0.0141645	0.251988	0.00861096
Da0	0.25466	0.00645462	0.267481	0.00670788
Ei2	0.218826	0.0275517	0.254671	0.0195433
Kl0	0.239651	0.0192223	0.253447	0.00845327
Lip0	0.317683	0.038293	0.281213	0.0217135
Mh1	0.238851	0.00374663	0.242157	0.00800965
Old1	0.218318	0.0177852	0.24566	0.0142344
Peter	0.256179	0.0272286	0.26076	0.0243382
RRS7	0.230613	0.0263282	0.245135	0.0211925

## Sheet: Suppl. Data S8 - RGRSTR(chase)
Supplemental Data S8: RGRSTR(chase) and propagated error obtained with R script.
Genotype	RGRSTR(chase)	SE (RGRSTR(chase))
Ang0	0.198804	0.0252098
Bsch2	0.219711	0.0120118
Bu2	0.216598	0.0186366
Col0	0.206496	0.0183445
Cvi	0.191648	0.0198786
Da0	0.205971	0.0195377
Ei2	0.204	0.0254784
Kl0	0.21513	0.0251753
Lip0	0.207335	0.0194579
Mh1	0.216316	0.014927
Old1	0.232581	0.0216728
Peter	0.197416	0.0202213
RRS7	0.212436	0.0231029

## Sheet: Suppl. Data S9 - KD(chase)
Supplemental Data S9: KD(chase) and propagated error obtained with R script.
Genotype	KD(chase)_Alanine	SE (KD(chase)_Alanine)	KD(chase)_Serine	SE (KD(chase)_Serine)
Ang0	0.0692258	0.0504127	0.0635263	0.0357222
Bsch2	0.0472193	0.0324483	0.0476381	0.016409
Bu2	0.0251212	0.0285482	0.0358149	0.0210919
Col0	0.0191191	0.0294347	0.0459439	0.020034
Cvi	0.0434477	0.0244089	0.0603396	0.0216635
Da0	0.0486885	0.0205763	0.0615098	0.0206571
Ei2	0.0148266	0.0375266	0.0506712	0.0321105
Kl0	0.024521	0.0316747	0.0383178	0.0265566
Lip0	0.110347	0.042953	0.0738775	0.0291562
Mh1	0.0225342	0.01539	0.0258406	0.0169402
Old1	-0.0142623	0.0280361	0.0130798	0.0259293
Peter	0.0587624	0.033916	0.063344	0.0316425
RRS7	0.0181772	0.0350274	0.0326993	0.0313507
